# Supplementary material for: Amelioration of cognitive impairments in APPswe/PS1dE9 mice is associated with metabolites alteration induced by total salvianolic acid
Source: PubMed Central journal article supplement (PMC5373599; doi:10.1371/journal.pone.0174763), 2017-03-30
Supplement: pone.0174763.s003.pdf [file pone.0174763.s003.pdf]

S1 Table Preference index of the four groups in the NOR experiment.

| Group        | n | 1H            | 24H         |
|--------------|---|---------------|-------------|
|              |   | mean±SE       | mean±SE     |
| WT control   | 5 | 0.848±0.068## | 0.739±0.110 |
| APP/PS1 TG   | 5 | 0.584±0.055** | 0.655±0.024 |
| 30 mg/kg TSA | 5 | 0.933±0.049## | 0.798±0.131 |
| 60 mg/kg TSA | 5 | 0.644±0.040*  | 0.602±0.059 |

Note: \* $p < 0.05$ , \*\* $p < 0.01$  vs WT control group; # $p < 0.05$ , ## $p < 0.01$  vs APP/PS1 transgenic group.
