# Supplementary material for: Amelioration of cognitive impairments in APPswe/PS1dE9 mice is associated with metabolites alteration induced by total salvianolic acid
Source: PubMed Central journal article supplement (PMC5373599; doi:10.1371/journal.pone.0174763), 2017-03-30
Supplement: pone.0174763.s004.pdf [file pone.0174763.s004.pdf]

S2 Table Effects of TSA on escape latency of APP/PS1 mice in the spatial navigation trials (mean  $\pm$ SE).

| Group        | n | Escape latency      |                     |                     |                     |                      |
|--------------|---|---------------------|---------------------|---------------------|---------------------|----------------------|
|              |   | 1 <sup>st</sup> day | 2 <sup>nd</sup> day | 3 <sup>rd</sup> day | 4 <sup>th</sup> day | 5 <sup>th</sup> day  |
| WT control   | 5 | 45.294 $\pm$ 6.876  | 53.406 $\pm$ 4.100  | 41.140 $\pm$ 6.409  | 23.568 $\pm$ 5.102  | 23.810 $\pm$ 6.296## |
| APP/PS1 TG   | 5 | 50.009 $\pm$ 6.701  | 49.170 $\pm$ 3.795  | 48.128 $\pm$ 4.918  | 41.064 $\pm$ 7.125  | 43.676 $\pm$ 4.453** |
| 30 mg/kg TSA | 5 | 45.984 $\pm$ 4.266  | 49.398 $\pm$ 4.817  | 27.712 $\pm$ 3.520  | 26.240 $\pm$ 4.902  | 23.780 $\pm$ 4.349## |
| 60 mg/kg TSA | 5 | 57.090 $\pm$ 2.151  | 47.110 $\pm$ 4.710  | 34.697 $\pm$ 7.006  | 33.382 $\pm$ 6.076  | 27.542 $\pm$ 2.263#  |

Note: \* $p$ <0.05, \*\* $p$ <0.01 vs WT control group; # $p$ <0.05, ## $p$ < 0.01 vs APP/PS1 transgenic group.
