# Supplementary material for: Amelioration of cognitive impairments in APPswe/PS1dE9 mice is associated with metabolites alteration induced by total salvianolic acid
Source: PubMed Central journal article supplement (PMC5373599; doi:10.1371/journal.pone.0174763), 2017-03-30
Supplement: pone.0174763.s005.pdf [file pone.0174763.s005.pdf]

S3 Table Effects of TSA on memory of 7-month-old APP/PS1 mice in spatial probe trials (mean  $\pm$ SE).

| Group        | n | Latency (s)          | Frequency of platform crossings | Time ratio of target quadrant (%) |
|--------------|---|----------------------|---------------------------------|-----------------------------------|
| WT control   | 5 | 21.440 $\pm$ 1.224## | 1.800 $\pm$ 0.583#              | 22.880 $\pm$ 2.121#               |
| APP/PS1 TG   | 5 | 56.372 $\pm$ 3.491** | 0.400 $\pm$ 0.245*              | 13.300 $\pm$ 3.663*               |
| 30 mg/kg TSA | 5 | 18.282 $\pm$ 4.089## | 3.000 $\pm$ 0.894#              | 17.454 $\pm$ 0.780                |
| 60 mg/kg TSA | 5 | 19.082 $\pm$ 3.718## | 2.000 $\pm$ 0.775#              | 21.718 $\pm$ 2.256#               |

Note: \* $p$ <0.05, \*\* $p$ <0.01 vs WT control group; # $p$ <0.05, ## $p$ < 0.01 vs APP/PS1 transgenic group.
