# Supplementary material for: Amelioration of cognitive impairments in APPswe/PS1dE9 mice is associated with metabolites alteration induced by total salvianolic acid
Source: PubMed Central journal article supplement (PMC5373599; doi:10.1371/journal.pone.0174763), 2017-03-30
Supplement: pone.0174763.s006.pdf [file pone.0174763.s006.pdf]

S4 Table Latency of mice in step-through passive avoidance task (s).

| Group        | n | Step-through latency |
|--------------|---|----------------------|
| WT control   | 5 | 161.240±9.086        |
| APP/PS1 TG   | 5 | 66.952±35.100        |
| 30 mg/kg TSA | 5 | 175.808±4.456        |
| 60 mg/kg TSA | 5 | 104.938±34.530       |

Note: Data are presented as the mean ±SEM,  $n=20$ .
