# Supplementary material for: Amelioration of cognitive impairments in APPswe/PS1dE9 mice is associated with metabolites alteration induced by total salvianolic acid
Source: PubMed Central journal article supplement (PMC5373599; doi:10.1371/journal.pone.0174763), 2017-03-30
Supplement: pone.0174763.s007.pdf [file pone.0174763.s007.pdf]

S5 Table A $\beta$ 42 and A $\beta$ 40 levels and the ratio of them in the hippocampal homogenates of mice (mean  $\pm$ SE).

| Group        | n | A $\beta$ 42 (pg/mg)     | A $\beta$ 40 (pg/mg)  | A $\beta$ 42/A $\beta$ 40 |
|--------------|---|--------------------------|-----------------------|---------------------------|
| WT control   | 5 | 1.304 $\pm$ 0.143##      | 8.051 $\pm$ 0.361##   | 0.162 $\pm$ 0.016#        |
| APP/PS1 TG   | 5 | 749.103 $\pm$ 117.136**  | 77.496 $\pm$ 9.741**  | 9.942 $\pm$ 1.544*        |
| 30 mg/kg TSA | 5 | 346.505 $\pm$ 114.879*## | 24.772 $\pm$ 7.287*## | 13.296 $\pm$ 2.692*       |
| 60 mg/kg TSA | 5 | 348.135 $\pm$ 41.575*##  | 41.378 $\pm$ 2.515*## | 8.743 $\pm$ 1.605*        |

Note: \* $p$ <0.05, \*\* $p$ <0.01 versus WT control group; # $p$ <0.05, ## $p$ <0.01 versus vehicle-treated APP<sup>swe</sup>/PS1<sup>dE9</sup> transgenic group.
