# Supplementary material for: Amelioration of cognitive impairments in APPswe/PS1dE9 mice is associated with metabolites alteration induced by total salvianolic acid
Source: PubMed Central journal article supplement (PMC5373599; doi:10.1371/journal.pone.0174763), 2017-03-30
Supplement: pone.0174763.s008.pdf [file pone.0174763.s008.pdf]

S6 Table The corresponding normalized peak area of metabolites in the hippocampus of mice identified by GS-TOF-MS.

| Metabolite          | WT control ( $\times 10^{-6}$ ) | APP/PS1 TG ( $\times 10^{-6}$ ) | 30 mg/kg TSA ( $\times 10^{-6}$ ) | 60 mg/kg TSA ( $\times 10^{-6}$ ) |
|---------------------|---------------------------------|---------------------------------|-----------------------------------|-----------------------------------|
| sorbitol            | 341.06 $\pm$ 52.25#             | 136.86 $\pm$ 57.43              | 479.72 $\pm$ 57.77##              | 361.41 $\pm$ 62.13#               |
| cholecalciferol     | 609.46 $\pm$ 306.60#            | 1436.96 $\pm$ 118.92            | 690.61 $\pm$ 169.86##             | 685.14 $\pm$ 362.19               |
| ascorbate           | 290.78 $\pm$ 32.10              | 103.46 $\pm$ 79.26              | 337.35 $\pm$ 139.07               | 469.49 $\pm$ 93.58#               |
| glucose-6-phosphate | 247.88 $\pm$ 123.94             | 99.95 $\pm$ 26.75               | 364.99 $\pm$ 36.74##              | 331.40 $\pm$ 209.05               |
| galactose           | 27941.38 $\pm$ 5910.77          | 34871.40 $\pm$ 6038.52          | 12007.54 $\pm$ 2433.38##          | 16077.82 $\pm$ 3175.81#           |
| sucrose-6-phosphate | 80.70 $\pm$ 39.70               | 64.53 $\pm$ 30.66               | 179.02 $\pm$ 11.44##              | 128.16 $\pm$ 17.58                |

Note: Values are in the mean $\pm$ SEM,  $n=20$ . # $p<0.05$ , ## $p<0.01$  vs APP/PS1 transgenic group.
